# Supplementary material for: Construction of protein capsules from novel amphiphilic two-helix bundle proteins (GP-ZiPs), designed by fusing the transmembrane region of glycophorin A with coiled-coil peptides
Source: Royal Society of Chemistry journal article supplement (doi:10.1039/d5ob01398d), 2025-01-01
Supplement: d5ob01398d1.pdf [file d5ob01398d1.pdf]

# Construction of Protein Capsules from Novel Amphiphilic Two-Helix Bundle Proteins (GP-ZiPs), designed by Fusing the Transmembrane Region of Glycophorin A with Coiled-Coil Peptides

Honami Yamazaki,<sup>a</sup> Gaku Umemoto<sup>a</sup> and Toshihisa Mizuno<sup>a, b\*</sup>

<sup>a</sup>*Department of Life Science and Applied Chemistry, Graduate School of Engineering, Nagoya Institute of Technology, Gokiso-cho, Showa-ku, Nagoya, Aichi 466-8555, Japan.*

<sup>b</sup>*Department of Nanopharmaceutical Sciences, Graduate School of Engineering, Nagoya Institute of Technology, Gokiso-cho Showa-ku, Nagoya, Aichi 466-8555, Japan.*

\*Corresponding author: Tel. & Fax: +81-52-735-5237; Email: [toshitcm@nitech.ac.jp](mailto:toshitcm@nitech.ac.jp)

### Trx-GP-ZIP41

MSDKIIHLTDDSFDTDLKADGAILVDFWAEWCGPCKMIAPILDEIADEYQGKLTVAKL  
TrxA

NIDQNPGTAPKYGIRGIPTLLLFKNGEVAATKVGALSKGQLKEFLDANLAGSGSGHMH

HHHHSSGLVPRGSAMAALKKELQANKKELAQLKWELQALKKELAQESSEGASGGSITLIM  
NZ GP-41

PGVMAGVIGTMLLMFSPILLISGIVGAIVGPIILTIGGSGGAGESEQLDKKLQALEKKL  
CZ

AQLEWKNQALEKKLAQ

### Trx-GP-ZIP29

MSDKIIHLTDDSFDTDLKADGAILVDFWAEWCGPCKMIAPILDEIADEYQGKLTVAKL  
TrxA

NIDQNPGTAPKYGIRGIPTLLLFKNGEVAATKVGALSKGQLKEFLDANLAGSGSGHMH

HHHHSSGLVPRGSAMAALKKELQANKKELAQLKWELQALKKELAQESEGAGVMAGVIGT  
NZ GP-29

MLLMFSPILLISGIVGAIVGGAGESEQLDKKLQALEKKLAQLEWKNQALEKKLAQ  
CZ

### Trx-GP-ZIP20

MSDKIIHLTDDSFDTDLKADGAILVDFWAEWCGPCKMIAPILDEIADEYQGKLTVAKL  
TrxA

NIDQNPGTAPKYGIRGIPTLLLFKNGEVAATKVGALSKGQLKEFLDANLAGSGSGHMH

HHHHSSGLVPRGSAMAALKKELQANKKELAQLKWELQALKKELAQESEVIGTMLLMFSP  
NZ GP-20

ILLISGIVGESEQLDKKLQALEKKLAQLEWKNQALEKKLAQ  
CZ

Fig. S1 Amino-acid sequences of Trx-GP-ZIPs.

**(a)**

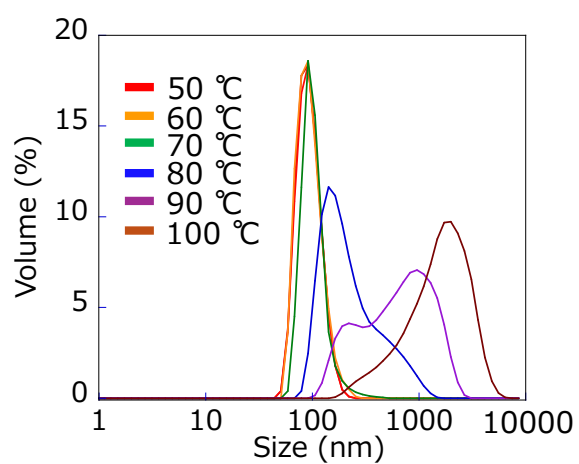

**(b)**

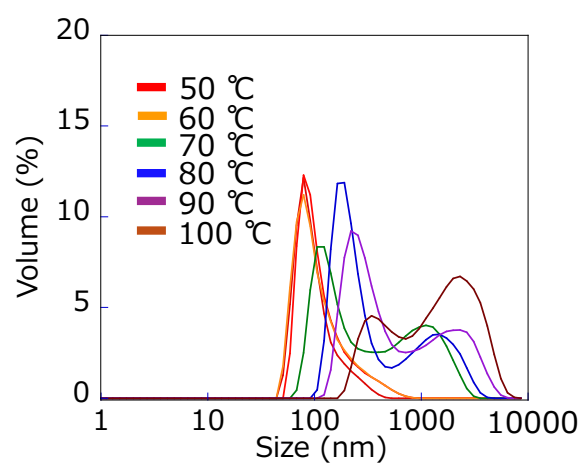

**Fig. S2** Alteration of DLS profiles of (a) GP-ZIP 41 and (b) GP-ZIP29 capsules after heat treatment of 50, 60, 70, 80, 90, and 100 °C.

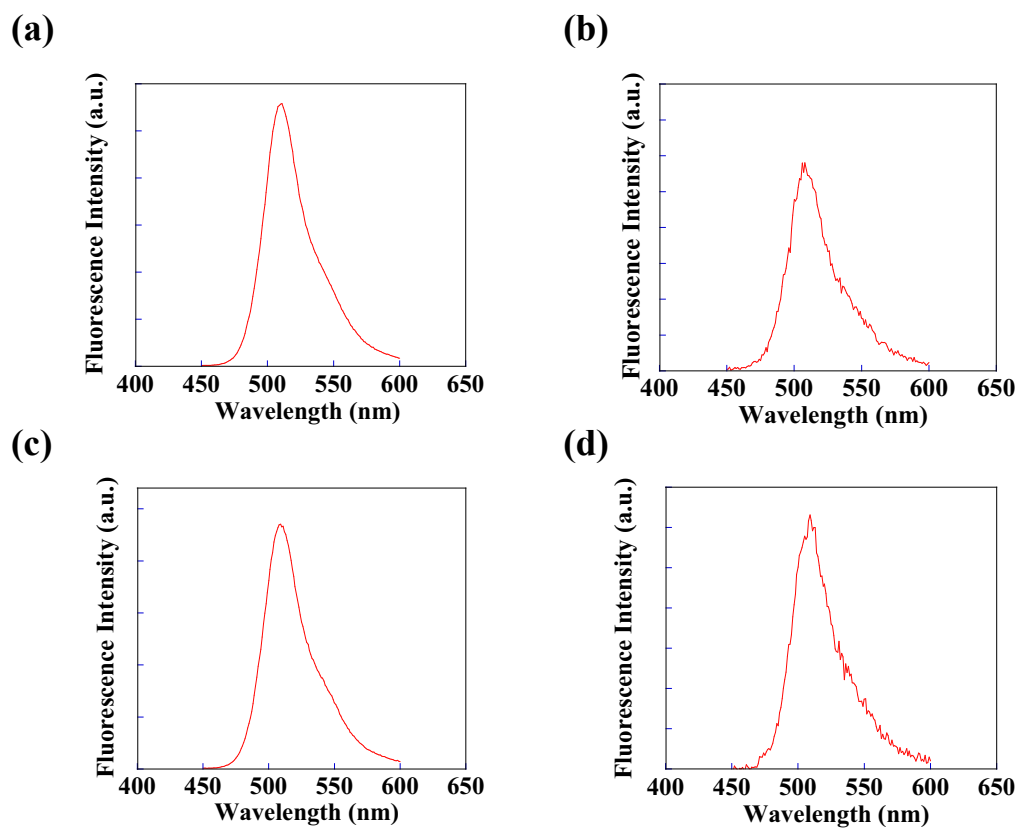

**Fig. S3** Fluorescence spectra of GFP: (a) in phosphate buffer (pH 7) and encapsulated within GP-ZIP capsules prepared by (b) Trx-GP-ZIP41, (c) Trx-GP-ZIP29, or (d) Trx-GP-ZIP20.

## **Experimental**

### **Materials**

Restriction enzymes, alkaline phosphatase, TaKaRa Ex Premier DNA Polymerase, DNA Ligation Kit <Mighty Mix> and His60 Ni Superflow Resin were purchased from Takara-bio. Inc. (Japan). pET-32a (+) DNA and fluorescein isothiocyanate (FITC) were purchased from Merck KGaA (Germany). Tris(hydroxymethyl)aminomethane (Tris), isopropyl- $\beta$ -D-thiogalactopyranoside (IPTG), agar, Agarose ME, Ampicillin Sodium and lysogeny broth (LB) medium (Lennox) were purchased from Wako Chemicals (Japan). Sephadex G-50 was purchased from Cytiva (Japan). Oligo DNAs for genetic mutations by PCR and synthetic DNA of GP-ZIP41, GP-ZIP29, GP-ZIP20 were purchased from Eurofins Genomics Co Ltd (Japan). Ribonuclease A from Bovine Pancreas was purchased from Nacalai Tesque Inc. (Japan). Other chemicals were used without further purification.

### **Expression and purification of Trx-GP-ZIPs**

DNA fragments with NcoI and HindIII restriction enzyme sites at each end, encoded for GP-ZIP41, GP-ZIP29, and GP-ZIP20 were inserted into a modified pET-32a(+) plasmid vector, which lacked the genes for S-tag and the enterokinase digestion site from the original. The expressed protein became a fusion protein, composed of thioredoxin A(TrxA) and GP-ZIP41, GP-ZIP29, or GP-ZIP20, respectively. *Escherichia coli* BL21(DE3) cells were transformed with the plasmid and were cultured in LB medium (Lennox) supplemented with ampicillin (100  $\mu$ g/mL) at 37 °C for 3 h, and for an additional 3h at 37°C in the presence of 1 mM IPTG. The cells were harvested, resuspended in 20 mM Tris HCl buffer (pH 8) with 100 mM NaCl, 10 mM imidazole, and 10 (v/v) % glycerol and sonicated. The pellet obtained by centrifugation (6000 rpm, 5 min, 4 °C) was resuspended in 10 mL of 8 M urea for 3 hours using a shaker (EYELA, Cute Mixer CM-1000) to solubilize the target proteins. The resulting solution was aliquoted into 2 mL microcentrifuge tubes and centrifuged (13,000 rpm, 40 min, 4 °C) to remove any insoluble contaminants. To purify the target proteins in supernatant, the 10 mL protein solution in 8 M urea was mixed with 10 mL of 50 mM phosphate buffer (pH 8.0), and the

mixture was centrifuged to remove host *E. coli*-derived proteins as a precipitant. The supernatant containing the target protein was transferred into dialysis tubing (pore size: 5 nm; molecular weight cut-off: 12–14 kDa) and dialyzed against 1 L of 2 M urea for 3 hours. Subsequently, stepwise dialysis was performed by gradually decreasing the urea concentration (1 M → 500 mM → 100 mM → 0 M), with each step for 3 hours, followed by overnight dialysis in 0 M urea (pure buffer). The precipitate formed after dialysis was collected as the purified target protein. The purity of target protein was analysed by SDS-PAGE analysis.

### **FITC-labelling of RNaseA**

Referring the previous study,<sup>3</sup> we prepared the FITC-labelled RNase A. Briefly, 20 mg (0.73  $\mu$ mol) of RNase A was suspended in 10 mL of 50 mM carbonate buffer (pH 10) and kept at 4 °C for 30 min. FITC (0.57 mg, 1.46  $\mu$ mol) was then added to the suspension, which was shaken overnight at 150 rpm using an orbital shaker (CD-100e, EYELATEC, Japan). The FITC-labelled RNase A was purified by washing it thrice in deionized water. Any unreacted FITC was removed and checked by SDS-PAGE before use.

### **Preparation of protein capsules of Trx-GP-ZIPs with or without encapsulating GFP or FITC-labelled RNase A**

For preparation of GP-ZIP protein capsules, 40  $\mu$ L of inner aqueous phase solution (20  $\mu$ L of 50 mM phosphate buffer (pH 7) with 150 mM sucrose and 20  $\mu$ L of TFE were mixed) containing Trx-GP-ZIP41, Trx-GP-ZIP29, or Trx-GP-ZIP20 with or without GFP or FITC-labelled RNase A was added to 500  $\mu$ L of liquid paraffin and it was sonicated to be a homogeneous emulsion by using an ultrasonic disruptor (UD-211, TOMY SEIKO Co. Ltd., Japan). The obtained emulsion was piled onto 500  $\mu$ L of 50 mM phosphate buffer in 1.5 mL tube and this two-phase solution was applied centrifugation (12000  $\times$  g, 4 °C, 15 min). The lower aqueous phase was carefully collected and transferred to a new 1.5 mL

microcentrifuge tube. To ensure complete removal of any residual precipitates or liquid paraffin, the sample was centrifuged again at 13,000 rpm for 10 minutes at 4 °C.

### **DLS analyses of the protein capsules of Trx-GP-ZIPs**

The mean hydrodynamic diameter of protein capsules of Trx-OLE-ZIP and ProG-OLE-ZIP was estimated using a Zetasizer Nano ZS (Malvern Panalytical Ltd., UK)

### **TEM measurements of spherical morphologies of protein capsules of Trx-GP-ZIPs**

TEM images were obtained with JEM-1400 Plus (JEOL, Japan). All samples were supported by dry-cast of protein solutions on a poval-coated Cu grid (Okenshoji Co., Ltd, Japan). The protein capsule solution was dropped Cu grid, after stand for approximately 5 min at room temperature. Droplets were removed with filter paper and dried. TEM analysis was performed at an accelerating voltage of 100 V.

### **Heat-treatment of Protein capsules of Trx-GP-ZIPs**

A 150 µL aliquot of the lower-phase solution prepared by an emulsion procedure was transferred to a 1.5 mL microcentrifuge tube and subjected to heat treatment at various temperatures (50, 60, 70, 80, 90, and 100 °C) for 5 minutes using a heat-block apparatus (MD-MINI, Major Science Co., Ltd, Taiwan). The samples were then cooled on ice for 5 minutes, and changes in particle size were evaluated using a Zetasizer Nano ZS (Malvern Panalytical Ltd., UK).
